# Supplementary material
Source: ML conference proceedings conference paper supplement (https://aclanthology.org/D17-1275)
Supplement: Attachment [file D17-1275.Attachment.zip]

Archive with 3 entries (2 files):
- supplementary.pdf
- __MACOSX/
- __MACOSX/._supplementary.pdf
